# Supplementary material for: Stabilization of yield in plant genotype mixtures through compensation rather than complementation
Source: PubMed Central journal article supplement (PMC3806538; doi:10.1093/aob/mct209), 2013-09-18

Fig. S1. Planting design for four-way mixtures of *Arabidopsis* genotypes.

|   |   |   |   |   |   |   |   |   |   |   |   |
|---|---|---|---|---|---|---|---|---|---|---|---|
| A | B | C | D | A | B | C | D | A | B | C | D |
| C | D | A | B | C | D | A | B | C | D | A | B |
| B | A | C | D | B | A | C | D | B | A | C | D |
| C | D | B | A | C | D | B | A | C | D | B | A |
| B | A | D | C | B | A | D | C | B | A | D | C |
| D | C | B | A | D | C | B | A | D | C | B | A |
| A | B | D | C | A | B | D | C | A | B | D | C |
| D | C | A | B | D | C | A | B | D | C | A | B |
| C | A | B | D | C | A | B | D | C | A | B | D |
| B | D | C | A | B | D | C | A | B | D | C | A |
| A | B | D | C | A | B | D | C | A | B | D | C |
| D | C | A | B | D | C | A | B | D | C | A | B |
| A | B | D | C | A | B | D | C | A | B | D | C |
| C | A | B | D | C | A | B | D | C | A | B | D |
| B | D | C | A | B | D | C | A | B | D | C | A |

Fig. S2. Mean seed production per plants of each genotype under high or low nutrient treatment for each experiment.

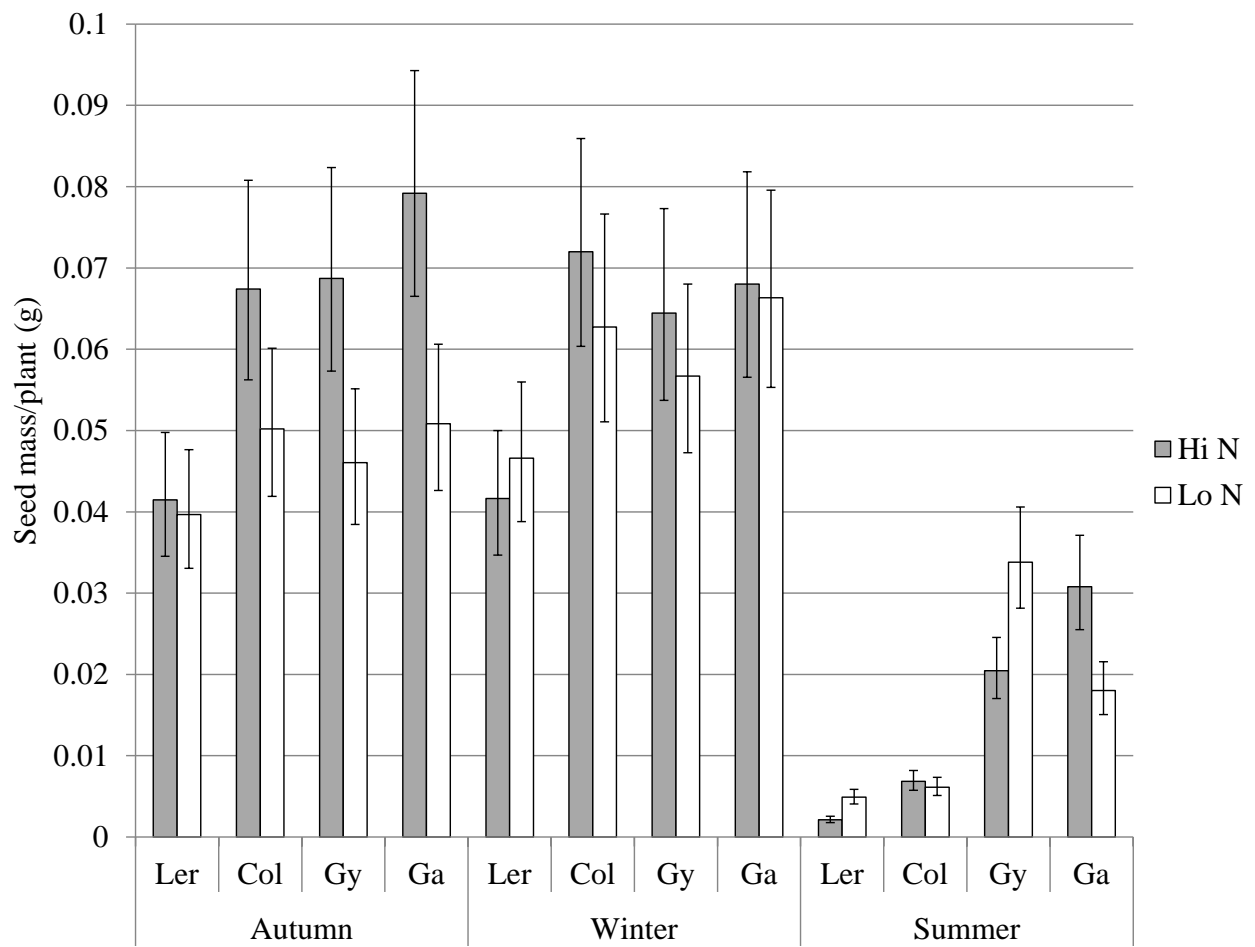

Fig. S3. Mean days taken to flower for four *Arabidopsis* genotypes grown in monoculture and mixture in a four-way mixture experiment.

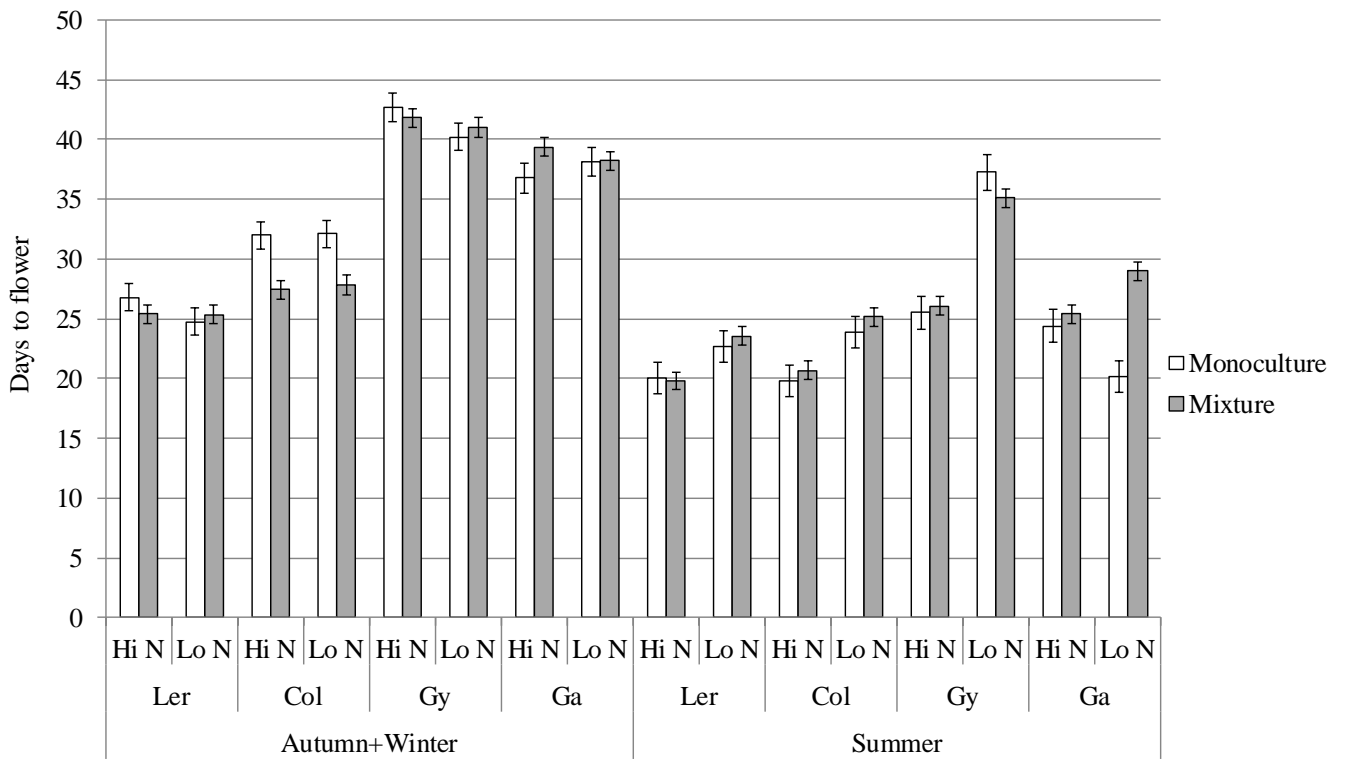

Fig. S4. Mean plant height for each genotype grown in each experiment.

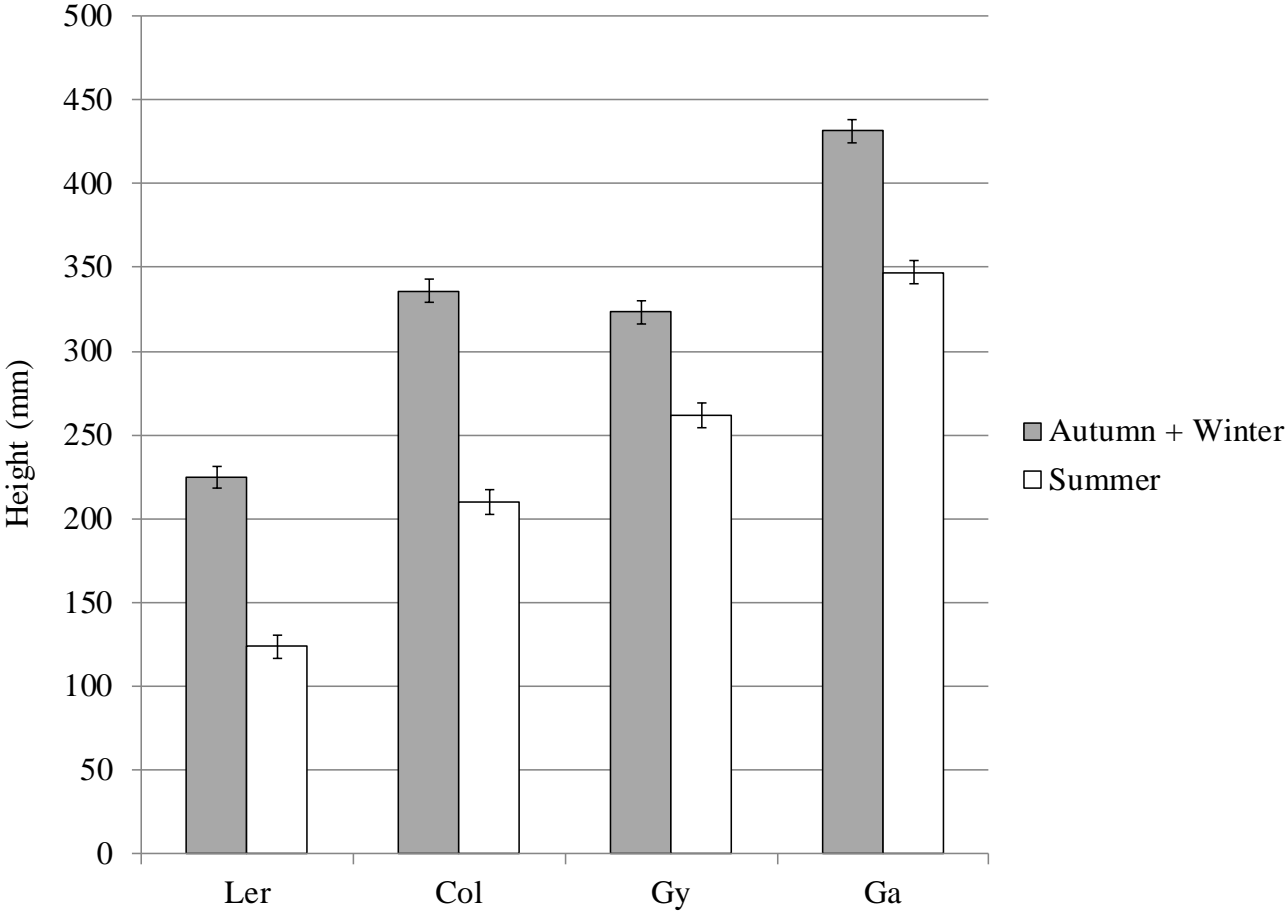

Fig. S5. Mean seed production in mixtures and monocultures in the pair-wise interaction experiments.

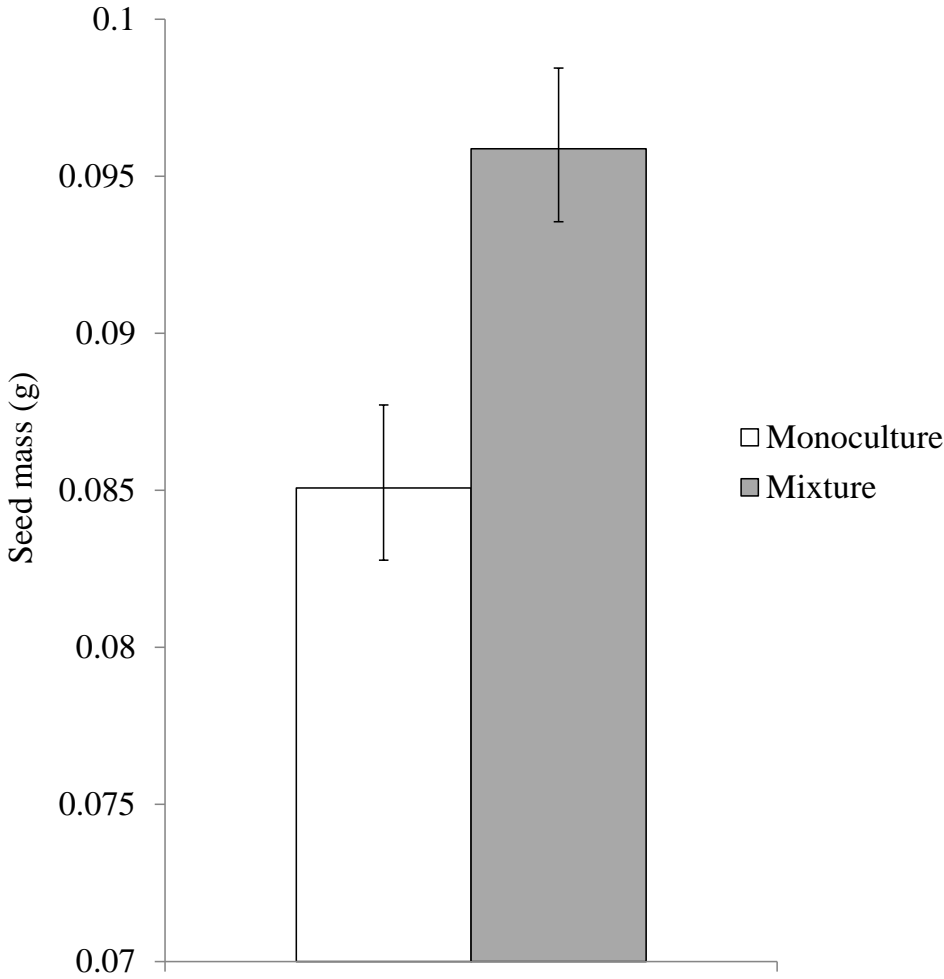

Fig. S6: Seedling root growth after ten days growth on 1/2 MS plates.

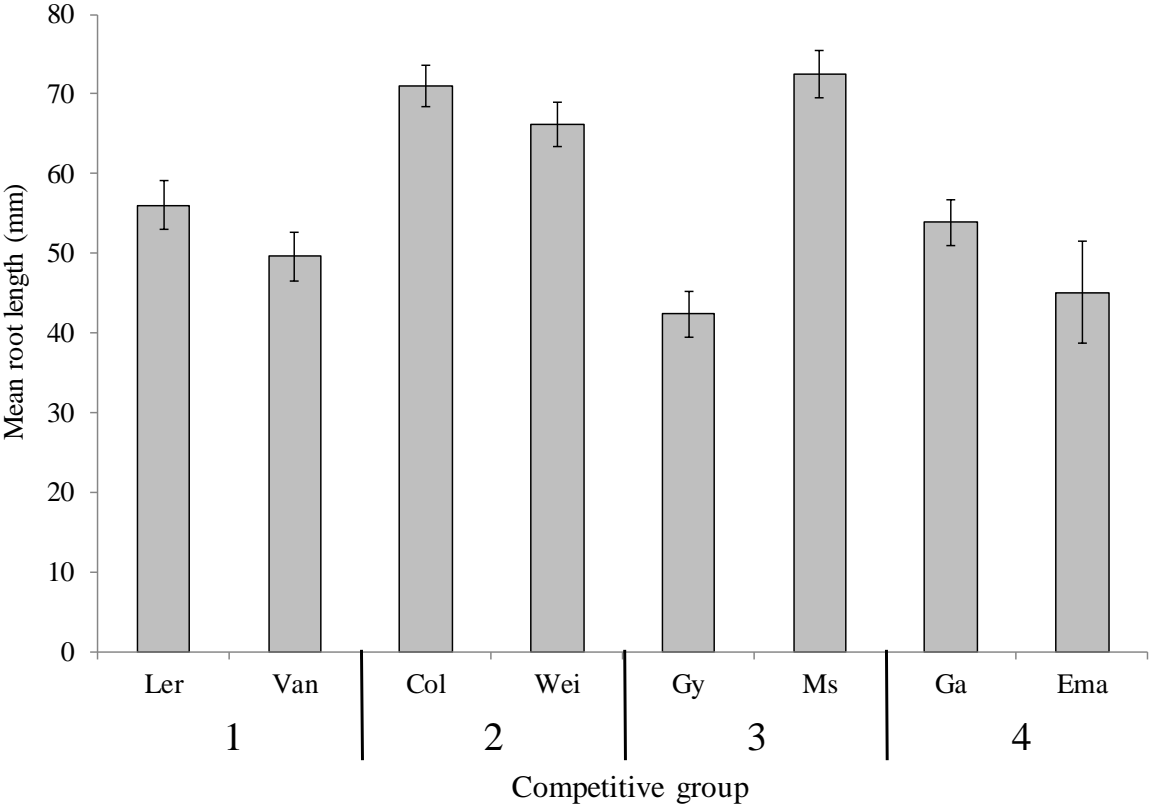

Supplement: supp_mct209_mct209supp_figs.pdf [file supp_mct209_mct209supp_figs.pdf]
