# Supplementary material for: Stabilization of yield in plant genotype mixtures through compensation rather than complementation
Source: PubMed Central journal article supplement (PMC3806538; doi:10.1093/aob/mct209), 2013-09-18
Supplement: supp_mct209_mct209supp_tables.pdf [file supp_mct209_mct209supp_tables.pdf]

**Table S1.** The effect of *Arabidopsis* genotypic diversity and different growing conditions on seed productivity in the four-way mixture experiments. In each case, a linear mixed model was used to analyse each factor and the interactions between them. Fixed effects included growing season (autumn, winter, summer), nutrient level (high/low) and cultivation (monoculture/mixture) and genotype. Non-significant interaction terms were removed from each model. F: variance ratio for use in F-test; n.d.f.: numerator degrees of freedom; d.d.f.: denominator degrees of freedom.

a) Analysis of combined data from all three experiments. N=1880.

| Fixed effect                            | F      | n.d.f. | d.d.f. | P      |
|-----------------------------------------|--------|--------|--------|--------|
| season                                  | 305.66 | 2      | 63.5   | <0.001 |
| nutrient level                          | 0.92   | 1      | 60.3   | 0.3    |
| cultivation                             | 5.52   | 1      | 61.7   | 0.02   |
| genotype                                | 153.45 | 3      | 940.5  | <0.001 |
| season x nutrient                       | 11.99  | 2      | 65.3   | <0.001 |
| season x cultivation                    | 13.39  | 2      | 66.9   | <0.001 |
| genotype x season                       | 56.17  | 6      | 888.6  | <0.001 |
| genotype x nutrient level               | 5.26   | 3      | 921.1  | 0.001  |
| genotype x cultivation                  | 25.29  | 3      | 135.4  | <0.001 |
| genotype x season x nutrient level      | 4.48   | 6      | 834.9  | <0.001 |
| genotype x season x cultivation         | 2.48   | 6      | 157.4  | 0.03   |
| genotype x nutrient level x cultivation | 3.68   | 4      | 108.4  | 0.007  |

b) Analysis of data from the autumn and winter seasons of the four-way mixture experiment. N=1260.

| Fixed term                | F     | n.d.f. | d.d.f. | P      |
|---------------------------|-------|--------|--------|--------|
| season                    | 2.12  | 1      | 47.5   | 0.02   |
| nutrient level            | 12.53 | 1      | 46.5   | <0.001 |
| cultivation               | 2.39  | 1      | 47.3   | 0.1    |
| genotype                  | 67.7  | 3      | 750.4  | <0.001 |
| season x nutrient level   | 5.43  | 1      | 47.1   | 0.02   |
| genotype x nutrient level | 3.14  | 3      | 751.4  | 0.03   |
| genotype x cultivation    | 16.23 | 3      | 105.4  | <0.001 |

c) Analysis of data from the summer season of the four-way mixture experiment. N= 620.

| Fixed term                              | F      | n.d.f. | d.d.f. | P      |
|-----------------------------------------|--------|--------|--------|--------|
| nutrient level                          | 10.66  | 1      | 21.0   | 0.004  |
| cultivation                             | 39.17  | 1      | 23.0   | <0.001 |
| genotype                                | 156.92 | 3      | 184.8  | <0.001 |
| genotype x nutrient level               | 7.43   | 3      | 159.1  | <0.001 |
| genotype x cultivation                  | 11.82  | 3      | 62.0   | <0.001 |
| genotype x nutrient level x cultivation | 3.22   | 4      | 49.9   | 0.02   |

**Table S2.** The effect of *Arabidopsis* genotypic diversity and different growing conditions on days to flowering in all three growing seasons of a four-way mixture experiment. A linear mixed model analysed each factor individually and the interactions between them. Fixed factors include experimental season, nutrient level (high/low) and cultivation (monoculture/mixture) and genotype. N=1880. F: variance ratio for use in F-test; n.d.f.: numerator degrees of freedom; d.d.f.: denominator degrees of freedom.

| Fixed effect                                   | F      | n.d.f. | d.d.f. | P      |
|------------------------------------------------|--------|--------|--------|--------|
| season                                         | 284.45 | 2      | 55.5   | <0.001 |
| nutrient level                                 | 9.60   | 1      | 52.9   | 0.003  |
| cultivation                                    | 0.01   | 1      | 56.9   | 0.9    |
| genotype                                       | 876.13 | 3      | 1125.3 | <0.001 |
| season x nutrient level                        | 20.58  | 2      | 53.8   | <0.001 |
| season x genotype                              | 45.47  | 6      | 1204.2 | <0.001 |
| nutrient x genotype                            | 3.80   | 3      | 1124.0 | 0.01   |
| cultivation x genotype                         | 10.30  | 3      | 124.6  | <0.001 |
| season x nutrient level x genotype             | 7.46   | 6      | 1097.0 | <0.001 |
| season x cultivation x genotype                | 13.17  | 8      | 105.0  | <0.001 |
| season x nutrient level cultivation x genotype | 2.01   | 12     | 102.5  | 0.03   |

**Table S3.** The effect of *Arabidopsis* genotypic diversity and different growing conditions on seed productivity in a pair-wise interaction experiment. A linear mixed model was used to analyse each factor and all interactions between them. Fixed effects included genotype, competition type (above ground only/above and below ground) and cultivation (mixture/monoculture). Non-significant terms were eliminated from the model. *F* and *P* values refer to ANOVA tests of each factor separately and the interactions between them. N=639.

| Fixed term                  | F      | n.d.f. | d.d.f. | P      |
|-----------------------------|--------|--------|--------|--------|
| genotype                    | 137.76 | 7      | 275.3  | <0.001 |
| competition type            | 23.47  | 2      | 173.2  | <0.001 |
| cultivation                 | 9.87   | 1      | 287.2  | <0.001 |
| genotype x competition type | 7.91   | 14     | 176.7  | <0.001 |

**Table S4.** The effect of competitive group of the focal and competing plant, competition type (above ground only/above and below ground) on seed productivity of *Arabidopsis* plants in the pair-wise interaction experiments. A linear mixed model was used to analyse each factor and the interactions between them. Fixed effects included growing season, competition type (above/below-ground), competitive group of focal plant competitive group of competing plant. Non-significant interaction terms were removed from each model. *F* and *P* values refer to ANOVA tests of each factor separately and the interactions between them. N=639.

| Fixed term                                              | F     | n.d.f. | d.d.f. | P      |
|---------------------------------------------------------|-------|--------|--------|--------|
| competition type                                        | 4.58  | 1      | 295.5  | 0.03   |
| competitive group of focal plant                        | 143.6 | 3      | 295.6  | <0.001 |
| competitive group of competing plant                    | 6.16  | 3      | 295.5  | <0.001 |
| competition type x competitive group of focal plant     | 19.92 | 3      | 295.7  | <0.001 |
| competition type x competitive group of competing plant | 3.77  | 3      | 295.5  | 0.01   |

**Table S5.** The effect of competition (presence/absence of competitors) and competitive group of the focal plant on seed productivity of *Arabidopsis* plants in a pair-wise interaction experiment. A linear mixed model was used to analyse each factor and all interactions between them. Fixed effects included growing season, competition type (above/below-ground), competitive group of focal plant competitive group of competing plant. Non-significant interaction terms were removed from each model. *F* and *P* values refer to ANOVA tests of each factor separately and the interactions between them. N=639.

| Fixed term                                                           | F     | n.d.f. | d.d.f. | P      |
|----------------------------------------------------------------------|-------|--------|--------|--------|
| competition (presence/absence)                                       | 18.39 | 1      | 212.0  | <0.001 |
| competitive group of focal plant                                     | 347.7 | 3      | 308.5  | <0.001 |
| competition (presence/absence) x competitive group of<br>focal plant | 16.1  | 3      | 212.1  | 0.001  |
